# Supplementary material for: LinkedSV for detection of mosaic structural variants from linked-read exome and genome sequencing data
Source: PubMed Central journal article supplement (PMC6898185; doi:10.1038/s41467-019-13397-7), 2019-12-06
Supplement: 41467_2019_13397_MOESM3_ESM.pdf [file 41467_2019_13397_MOESM3_ESM.pdf]

## **Description of Additional Supplementary Files**

### **Supplementary Data 1.**

Simulated SVs in the WGS data set

### **Supplementary Data 2.**

Simulated SVs in the WES data set

### **Supplementary Movie 1.**

**Explanation of enriched fragment endpoints for tandem duplications.** The movie shows the mapping process of the linked reads and how the fragment endpoints are enriched near the breakpoints.
